# Supplementary material for: Machine Learning Predicts Antimicrobial Resistance from Genomic Data across ESKAPEE Pathogens
Source: Research Square preprint supplement (doi:10.21203/rs.3.rs-7190203/v1), 2025-08-01
Supplement: Supplementary file 1 [file 49a06ad43c0740dec2fec387.xlsx]

## Sheet: Sheet1
Antibiotic	Accuracy_Final	Precision_Final	Recall_Final	F1_Score_Final	Accuracy_Escherichia	Precision_Escherichia	Recall_Escherichia	F1_Score_Escherichia	Accuracy_Enterococcus	Precision_Enterococcus	Recall_Enterococcus	F1_Score_Enterococcus	Accuracy_Staphylococcus	Precision_Staphylococcus	Recall_Staphylococcus	F1_Score_Staphylococcus	Accuracy_Klebsiella	Precision_Klebsiella	Recall_Klebsiella	F1_Score_Klebsiella	Accuracy_Acinetobacter	Precision_Acinetobacter	Recall_Acinetobacter	F1_Score_Acinetobacter	Accuracy_Pseudomonas	Precision_Pseudomonas	Recall_Pseudomonas	F1_Score_Pseudomonas	Accuracy_Enterobacter	Precision_Enterobacter	Recall_Enterobacter	F1_Score_Enterobacter
cefazolin	0.94	0.94	0.93	0.93	0.94	0.94	0.93	0.93	NA	NA	NA	NA	NA	NA	NA	NA	NA	NA	NA	NA	NA	NA	NA	NA	NA	NA	NA	NA	NA	NA	NA	NA
chloramphenicol	1.00	0.99	0.99	0.99	1.00	0.99	0.99	0.99	NA	NA	NA	NA	NA	NA	NA	NA	0.98	0.97	0.98	0.98	NA	NA	NA	NA	NA	NA	NA	NA	NA	NA	NA	NA
oxacillin	0.99	0.98	0.98	0.98	NA	NA	NA	NA	NA	NA	NA	NA	0.99	0.98	0.98	0.98	NA	NA	NA	NA	NA	NA	NA	NA	NA	NA	NA	NA	NA	NA	NA	NA
nitrofurantoin	0.93	0.94	0.93	0.93	0.96	0.48	0.50	0.49	NA	NA	NA	NA	NA	NA	NA	NA	0.93	0.96	0.59	0.64	NA	NA	NA	NA	NA	NA	NA	NA	0.75	0.80	0.80	0.75
meropenem	0.97	0.96	0.95	0.95	1.00	1.00	0.91	0.95	NA	NA	NA	NA	NA	NA	NA	NA	0.93	0.93	0.92	0.93	0.95	0.95	0.95	0.95	0.90	0.90	0.89	0.90	0.94	0.94	0.93	0.93
ampicillin-sulbactam	0.95	0.94	0.94	0.94	0.90	0.86	0.91	0.88	NA	NA	NA	NA	NA	NA	NA	NA	0.97	0.74	0.63	0.67	0.94	0.94	0.94	0.94	NA	NA	NA	NA	NA	NA	NA	NA
levofloxacin	0.97	0.95	0.96	0.96	0.98	0.96	0.96	0.96	NA	NA	NA	NA	0.99	0.98	0.99	0.99	0.97	0.92	0.92	0.92	0.97	0.95	0.96	0.95	0.96	0.95	0.97	0.96	0.91	0.93	0.90	0.90
amoxicillin-clavulanicAcid	0.98	0.98	0.96	0.97	0.98	0.98	0.93	0.95	NA	NA	NA	NA	NA	NA	NA	NA	0.97	0.96	0.97	0.96	NA	NA	NA	NA	NA	NA	NA	NA	NA	NA	NA	NA
colistin	0.87	0.81	0.78	0.79	0.96	0.98	0.81	0.87	NA	NA	NA	NA	NA	NA	NA	NA	0.71	0.70	0.70	0.70	0.94	0.97	0.78	0.84	NA	NA	NA	NA	NA	NA	NA	NA
tigecycline	0.97	0.98	0.62	0.69	NA	NA	NA	NA	NA	NA	NA	NA	NA	NA	NA	NA	0.97	0.98	0.62	0.69	NA	NA	NA	NA	NA	NA	NA	NA	NA	NA	NA	NA
cefoxitin	0.93	0.93	0.91	0.92	0.97	0.96	0.89	0.92	NA	NA	NA	NA	0.88	0.81	0.85	0.83	0.88	0.87	0.88	0.87	NA	NA	NA	NA	NA	NA	NA	NA	NA	NA	NA	NA
linezolid	0.98	0.99	0.60	0.66	NA	NA	NA	NA	NA	NA	NA	NA	0.98	0.99	0.60	0.66	NA	NA	NA	NA	NA	NA	NA	NA	NA	NA	NA	NA	NA	NA	NA	NA
tobramycin	0.96	0.96	0.96	0.96	0.99	0.98	0.95	0.96	NA	NA	NA	NA	NA	NA	NA	NA	0.94	0.93	0.93	0.93	0.94	0.94	0.94	0.94	0.99	0.97	0.99	0.98	0.94	0.94	0.92	0.93
ciprofloxacin	0.98	0.98	0.98	0.98	0.99	0.99	0.98	0.98	NA	NA	NA	NA	0.98	0.99	0.88	0.92	0.97	0.92	0.93	0.93	0.99	0.98	0.99	0.99	0.97	0.91	0.98	0.94	0.98	0.98	0.98	0.98
clindamycin	0.97	0.97	0.94	0.95	NA	NA	NA	NA	NA	NA	NA	NA	0.97	0.97	0.94	0.95	NA	NA	NA	NA	NA	NA	NA	NA	NA	NA	NA	NA	NA	NA	NA	NA
amikacin	0.96	0.95	0.94	0.94	0.99	0.91	0.75	0.81	NA	NA	NA	NA	NA	NA	NA	NA	0.92	0.92	0.91	0.92	0.96	0.96	0.96	0.96	0.93	0.90	0.88	0.89	0.96	0.98	0.67	0.74
penicillin	0.97	0.92	0.95	0.93	NA	NA	NA	NA	NA	NA	NA	NA	0.97	0.92	0.95	0.93	NA	NA	NA	NA	NA	NA	NA	NA	NA	NA	NA	NA	NA	NA	NA	NA
ceftriaxone	0.99	0.99	0.99	0.99	0.99	0.98	0.99	0.98	NA	NA	NA	NA	NA	NA	NA	NA	0.98	0.96	0.96	0.96	0.99	0.97	0.94	0.95	NA	NA	NA	NA	NA	NA	NA	NA
trimethoprim	0.98	0.98	0.98	0.98	0.99	0.99	0.99	0.99	NA	NA	NA	NA	NA	NA	NA	NA	0.93	0.96	0.88	0.91	NA	NA	NA	NA	NA	NA	NA	NA	NA	NA	NA	NA
minocycline	0.87	0.83	0.77	0.79	NA	NA	NA	NA	NA	NA	NA	NA	NA	NA	NA	NA	0.70	0.66	0.64	0.64	0.96	0.98	0.88	0.92	NA	NA	NA	NA	NA	NA	NA	NA
ampicillin	0.98	0.98	0.97	0.97	0.98	0.98	0.97	0.97	NA	NA	NA	NA	NA	NA	NA	NA	NA	NA	NA	NA	NA	NA	NA	NA	NA	NA	NA	NA	NA	NA	NA	NA
doripenem	0.97	0.97	0.97	0.97	1.00	1.00	1.00	1.00	NA	NA	NA	NA	NA	NA	NA	NA	0.96	0.96	0.94	0.95	1.00	1.00	1.00	1.00	0.90	0.90	0.88	0.89	0.91	0.93	0.90	0.91
sulfisoxazole	0.99	0.99	0.98	0.98	0.99	0.99	0.98	0.98	NA	NA	NA	NA	NA	NA	NA	NA	NA	NA	NA	NA	NA	NA	NA	NA	NA	NA	NA	NA	NA	NA	NA	NA
ertapenem	0.98	0.97	0.96	0.97	0.99	1.00	0.88	0.93	NA	NA	NA	NA	NA	NA	NA	NA	0.96	0.96	0.97	0.96	NA	NA	NA	NA	NA	NA	NA	NA	0.84	0.83	0.81	0.82
moxifloxacin	1.00	1.00	1.00	1.00	NA	NA	NA	NA	NA	NA	NA	NA	1.00	1.00	1.00	1.00	NA	NA	NA	NA	NA	NA	NA	NA	NA	NA	NA	NA	NA	NA	NA	NA
cefuroxime	0.99	0.99	0.77	0.85	NA	NA	NA	NA	NA	NA	NA	NA	NA	NA	NA	NA	0.99	0.99	0.77	0.85	NA	NA	NA	NA	NA	NA	NA	NA	NA	NA	NA	NA
cefotaxime	0.98	0.97	0.97	0.97	0.97	0.97	0.97	0.97	NA	NA	NA	NA	NA	NA	NA	NA	0.98	0.99	0.69	0.77	NA	NA	NA	NA	NA	NA	NA	NA	NA	NA	NA	NA
gentamicin	0.98	0.97	0.98	0.98	0.99	0.98	0.98	0.98	NA	NA	NA	NA	0.99	1.00	0.94	0.97	0.94	0.94	0.94	0.94	0.98	0.99	0.95	0.97	0.93	0.91	0.91	0.91	0.95	0.97	0.89	0.92
cefpodoxime	1.00	1.00	1.00	1.00	1.00	1.00	1.00	1.00	NA	NA	NA	NA	NA	NA	NA	NA	NA	NA	NA	NA	NA	NA	NA	NA	NA	NA	NA	NA	NA	NA	NA	NA
piperacillin_tazobactam	0.94	0.94	0.94	0.94	0.97	0.90	0.85	0.87	NA	NA	NA	NA	NA	NA	NA	NA	0.91	0.90	0.87	0.88	0.94	0.96	0.84	0.89	0.91	0.91	0.92	0.91	0.91	0.84	0.74	0.78
erythromycin	0.97	0.98	0.97	0.97	NA	NA	NA	NA	NA	NA	NA	NA	0.97	0.98	0.97	0.97	NA	NA	NA	NA	NA	NA	NA	NA	NA	NA	NA	NA	NA	NA	NA	NA
trimethoprim_sulfamethoxazole	0.97	0.96	0.96	0.96	0.98	0.97	0.95	0.96	NA	NA	NA	NA	NA	NA	NA	NA	0.94	0.94	0.94	0.94	0.95	0.95	0.84	0.88	NA	NA	NA	NA	0.98	0.98	0.98	0.98
tetracycline	0.97	0.97	0.97	0.97	0.99	0.99	0.99	0.99	NA	NA	NA	NA	0.98	0.92	0.95	0.93	0.90	0.90	0.90	0.90	0.97	0.96	0.98	0.97	NA	NA	NA	NA	0.96	0.95	0.95	0.95
cefotetan	0.96	0.90	0.98	0.93	NA	NA	NA	NA	NA	NA	NA	NA	NA	NA	NA	NA	0.96	0.90	0.98	0.93	NA	NA	NA	NA	NA	NA	NA	NA	NA	NA	NA	NA
imipenem	0.96	0.96	0.96	0.96	1.00	1.00	1.00	1.00	NA	NA	NA	NA	NA	NA	NA	NA	0.93	0.93	0.93	0.93	0.98	0.98	0.98	0.98	0.87	0.81	0.75	0.77	0.87	0.89	0.88	0.87
cefepime	0.92	0.91	0.92	0.92	0.95	0.91	0.91	0.91	NA	NA	NA	NA	NA	NA	NA	NA	0.87	0.84	0.79	0.81	0.95	0.93	0.94	0.94	0.91	0.92	0.91	0.91	0.93	0.93	0.93	0.93
aztreonam	0.95	0.95	0.95	0.95	0.96	0.94	0.91	0.92	NA	NA	NA	NA	NA	NA	NA	NA	0.94	0.89	0.68	0.73	NA	NA	NA	NA	0.92	0.92	0.92	0.92	NA	NA	NA	NA
azithromycin	1.00	0.87	0.80	0.83	1.00	0.87	0.80	0.83	NA	NA	NA	NA	NA	NA	NA	NA	NA	NA	NA	NA	NA	NA	NA	NA	NA	NA	NA	NA	NA	NA	NA	NA
ceftazidime	0.94	0.94	0.94	0.94	0.95	0.92	0.92	0.92	NA	NA	NA	NA	NA	NA	NA	NA	0.95	0.91	0.92	0.91	0.96	0.94	0.93	0.93	0.81	0.82	0.81	0.81	0.91	0.45	0.50	0.48
nalidixic_acid	0.99	0.97	0.96	0.96	1.00	1.00	0.99	0.99	NA	NA	NA	NA	NA	NA	NA	NA	0.81	0.81	0.80	0.81	NA	NA	NA	NA	NA	NA	NA	NA	NA	NA	NA	NA
