# Supplementary material for: Machine Learning Predicts Antimicrobial Resistance from Genomic Data across ESKAPEE Pathogens
Source: Research Square preprint supplement (doi:10.21203/rs.3.rs-7190203/v1), 2025-08-01
Supplement: Supplementary file 2 [file da1b390669760645e62b6009.xlsx]

## Sheet: Sheet1
Antibiotic	Total number	Escherichia	Escherichia_NumberOfResistantStrains	Klebsiella	Klebsiella_NumberOfResistantStrains	Acinetobacter	Acinetobacter_NumberOfResistantStrains	Staphylococcus	Staphylococcus_NumberOfResistantStrains	Pseudomonas	Pseudomonas_NumberOfResistantStrains	Enterobacter	Enterobacter_NumberOfResistantStrains	Enterococcus	Enterococcus_NumberOfResistantStrains
amikacin	6390	2213	50	1391	480	1832	845	0	0	707	142	247	14	0	0
amoxicillin-clavulanic acid	8197	6953	616	1244	873	0	0	0	0	0	0	0	0	0	0
ampicillin	7081	7081	3021	0	0	0	0	0	0	0	0	0	0	0	0
ampicillin-sulbactam	3549	259	196	1626	1570	1664	761	0	0	0	0	0	0	0	0
azithromycin	3080	3080	26	0	0	0	0	0	0	0	0	0	0	0	0
aztreonam	5284	2534	430	2426	2215	0	0	0	0	324	191	0	0	0	0
cefazolin	2701	2701	1092	0	0	0	0	0	0	0	0	0	0	0	0
cefepime	6726	3249	543	2332	1734	461	325	0	0	464	214	220	100	0	0
cefotaxime	3022	1908	1013	1114	1072	0	0	0	0	0	0	0	0	0	0
cefotetan	125	0	0	125	18	0	0	0	0	0	0	0	0	0	0
cefoxitin	6388	3872	504	2384	1410	0	0	132	105	0	0	0	0	0	0
cefpodoxime	249	158	100	91	88	0	0	0	0	0	0	0	0	0	0
ceftazidime	9826	4141	805	3125	2577	1709	1346	0	0	580	297	271	245	0	0
ceftriaxone	10315	5917	1226	2817	2422	1581	1460	0	0	0	0	0	0	0	0
cefuroxime	1688	0	0	1688	1632	0	0	0	0	0	0	0	0	0	0
chloramphenicol	3362	3132	274	230	157	0	0	0	0	0	0	0	0	0	0
ciprofloxacin	11167	5220	1607	2559	2308	1954	1619	668	43	537	468	229	109	0	0
clindamycin	756	0	0	0	0	0	0	756	186	0	0	0	0	0	0
colistin	1092	381	41	380	151	331	44	0	0	0	0	0	0	0	0
doripenem	1557	194	47	624	444	476	94	0	0	152	99	111	50	0	0
ertapenem	5013	3292	103	1468	899	0	0	0	0	0	0	253	166	0	0
erythromycin	732	0	0	0	0	0	0	732	337	0	0	0	0	0	0
gentamicin	14099	7979	975	2665	1282	1883	1566	826	39	534	363	212	47	0	0
imipenem	7525	2890	68	2218	1141	1795	666	0	0	467	380	155	70	0	0
levofloxacin	5961	1117	962	2032	1827	1424	1112	460	126	714	497	214	98	0	0
linezolid	834	0	0	0	0	0	0	834	25	0	0	0	0	0	0
meropenem	12853	8100	86	2769	1261	974	517	0	0	740	413	270	86	0	0
minocycline	372	0	0	133	45	239	42	0	0	0	0	0	0	0	0
moxifloxacin	328	0	0	0	0	0	0	328	28	0	0	0	0	0	0
nalidixic acid	3293	3161	174	132	63	0	0	0	0	0	0	0	0	0	0
nitrofurantoin	1430	502	20	888	810	0	0	0	0	0	0	40	23	0	0
oxacillin	768	0	0	0	0	0	0	768	176	0	0	0	0	0	0
penicillin	489	0	0	0	0	0	0	489	427	0	0	0	0	0	0
piperacillin-tazobactam	7693	4034	253	2634	1913	390	308	0	0	407	218	228	199	0	0
sulfisoxazole	3621	3621	911	0	0	0	0	0	0	0	0	0	0	0	0
tetracycline	11490	6814	2678	2104	1078	1562	1135	781	60	0	0	229	77	0	0
tigecycline	907	0	0	907	42	0	0	0	0	0	0	0	0	0	0
tobramycin	7305	2767	281	2265	1423	1610	1035	0	0	430	355	233	79	0	0
trimethoprim	471	394	190	77	56	0	0	0	0	0	0	0	0	0	0
trimethoprim-sulfamethoxazole	9983	6564	1234	1555	880	1604	1361	0	0	0	0	260	115	0	0
vancomycin	892	0	0	0	0	0	0	859	0	0	0	0	0	33	11
