# Supplementary material for: Machine Learning Predicts Antimicrobial Resistance from Genomic Data across ESKAPEE Pathogens
Source: Research Square preprint supplement (doi:10.21203/rs.3.rs-7190203/v1), 2025-08-01
Supplement: Supplementary file 3 [file efe3c7daa0f6fbb8f6da31de.xlsx]

## Sheet: Sheet1
Remove the antibiotics for each genera or all if one of the metrics is below 0.8
Antibiotic	Accuracy_Final	Precision_Final	Recall_Final	F1_Score_Final	Accuracy_Escherichia	Precision_Escherichia	Recall_Escherichia	F1_Score_Escherichia	Accuracy_Enterococcus	Precision_Enterococcus	Recall_Enterococcus	F1_Score_Enterococcus	Accuracy_Staphylococcus	Precision_Staphylococcus	Recall_Staphylococcus	F1_Score_Staphylococcus	Accuracy_Klebsiella	Precision_Klebsiella	Recall_Klebsiella	F1_Score_Klebsiella	Accuracy_Acinetobacter	Precision_Acinetobacter	Recall_Acinetobacter	F1_Score_Acinetobacter	Accuracy_Pseudomonas	Precision_Pseudomonas	Recall_Pseudomonas	F1_Score_Pseudomonas	Accuracy_Enterobacter	Precision_Enterobacter	Recall_Enterobacter	F1_Score_Enterobacter
cefazolin	0.94	0.94	0.93	0.93	0.94	0.94	0.93	0.93	NA	NA	NA	NA	NA	NA	NA	NA	NA	NA	NA	NA	NA	NA	NA	NA	NA	NA	NA	NA	NA	NA	NA	NA
chloramphenicol	1.00	0.99	0.99	0.99	1.00	0.99	0.99	0.99	NA	NA	NA	NA	NA	NA	NA	NA	0.98	0.97	0.98	0.98	NA	NA	NA	NA	NA	NA	NA	NA	NA	NA	NA	NA
oxacillin	0.99	0.98	0.98	0.98	NA	NA	NA	NA	NA	NA	NA	NA	0.99	0.98	0.98	0.98	NA	NA	NA	NA	NA	NA	NA	NA	NA	NA	NA	NA	NA	NA	NA	NA
nitrofurantoin	Removed	Removed	Removed	Removed	Removed	Removed	Removed	Removed	NA	NA	NA	NA	NA	NA	NA	NA	Removed	Removed	Removed	Removed	NA	NA	NA	NA	NA	NA	NA	NA	Removed	Removed	Removed	Removed
meropenem	0.97	0.96	0.95	0.95	1.00	1.00	0.91	0.95	NA	NA	NA	NA	NA	NA	NA	NA	0.93	0.93	0.92	0.93	0.95	0.95	0.95	0.95	0.90	0.90	0.89	0.90	0.94	0.94	0.93	0.93
ampicillin-sulbactam	0.95	0.94	0.94	0.94	0.90	0.86	0.91	0.88	NA	NA	NA	NA	NA	NA	NA	NA	Removed	Removed	Removed	Removed	0.94	0.94	0.94	0.94	NA	NA	NA	NA	NA	NA	NA	NA
levofloxacin	0.97	0.95	0.96	0.96	0.98	0.96	0.96	0.96	NA	NA	NA	NA	0.99	0.98	0.99	0.99	0.97	0.92	0.92	0.92	0.97	0.95	0.96	0.95	0.96	0.95	0.97	0.96	0.91	0.93	0.90	0.90
amoxicillin-clavulanicAcid	0.98	0.98	0.96	0.97	0.98	0.98	0.93	0.95	NA	NA	NA	NA	NA	NA	NA	NA	0.97	0.96	0.97	0.96	NA	NA	NA	NA	NA	NA	NA	NA	NA	NA	NA	NA
colistin	Removed	Removed	Removed	Removed	0.96	0.98	0.81	0.87	NA	NA	NA	NA	NA	NA	NA	NA	Removed	Removed	Removed	Removed	Removed	Removed	Removed	Removed	NA	NA	NA	NA	NA	NA	NA	NA
tigecycline	Removed	Removed	Removed	Removed	NA	NA	NA	NA	NA	NA	NA	NA	NA	NA	NA	NA	Removed	Removed	Removed	Removed	NA	NA	NA	NA	NA	NA	NA	NA	NA	NA	NA	NA
cefoxitin	0.93	0.93	0.91	0.92	0.97	0.96	0.89	0.92	NA	NA	NA	NA	0.88	0.81	0.85	0.83	0.88	0.87	0.88	0.87	NA	NA	NA	NA	NA	NA	NA	NA	NA	NA	NA	NA
linezolid	Removed	Removed	Removed	Removed	NA	NA	NA	NA	NA	NA	NA	NA	Removed	Removed	Removed	Removed	NA	NA	NA	NA	NA	NA	NA	NA	NA	NA	NA	NA	NA	NA	NA	NA
tobramycin	0.96	0.96	0.96	0.96	0.99	0.98	0.95	0.96	NA	NA	NA	NA	NA	NA	NA	NA	0.94	0.93	0.93	0.93	0.94	0.94	0.94	0.94	0.99	0.97	0.99	0.98	0.94	0.94	0.92	0.93
ciprofloxacin	0.98	0.98	0.98	0.98	0.99	0.99	0.98	0.98	NA	NA	NA	NA	0.98	0.99	0.88	0.92	0.97	0.92	0.93	0.93	0.99	0.98	0.99	0.99	0.97	0.91	0.98	0.94	0.98	0.98	0.98	0.98
clindamycin	0.97	0.97	0.94	0.95	NA	NA	NA	NA	NA	NA	NA	NA	0.97	0.97	0.94	0.95	NA	NA	NA	NA	NA	NA	NA	NA	NA	NA	NA	NA	NA	NA	NA	NA
amikacin	0.96	0.95	0.94	0.94	Removed	Removed	Removed	Removed	NA	NA	NA	NA	NA	NA	NA	NA	0.92	0.92	0.91	0.92	0.96	0.96	0.96	0.96	0.93	0.90	0.88	0.89	Removed	Removed	Removed	Removed
penicillin	0.97	0.92	0.95	0.93	NA	NA	NA	NA	NA	NA	NA	NA	0.97	0.92	0.95	0.93	NA	NA	NA	NA	NA	NA	NA	NA	NA	NA	NA	NA	NA	NA	NA	NA
ceftriaxone	0.99	0.99	0.99	0.99	0.99	0.98	0.99	0.98	NA	NA	NA	NA	NA	NA	NA	NA	0.98	0.96	0.96	0.96	0.99	0.97	0.94	0.95	NA	NA	NA	NA	NA	NA	NA	NA
trimethoprim	0.98	0.98	0.98	0.98	0.99	0.99	0.99	0.99	NA	NA	NA	NA	NA	NA	NA	NA	0.93	0.96	0.88	0.91	NA	NA	NA	NA	NA	NA	NA	NA	NA	NA	NA	NA
minocycline	0.87	0.83	0.77	0.79	NA	NA	NA	NA	NA	NA	NA	NA	NA	NA	NA	NA	Removed	Removed	Removed	Removed	0.96	0.98	0.88	0.92	NA	NA	NA	NA	NA	NA	NA	NA
ampicillin	0.98	0.98	0.97	0.97	0.98	0.98	0.97	0.97	NA	NA	NA	NA	NA	NA	NA	NA	NA	NA	NA	NA	NA	NA	NA	NA	NA	NA	NA	NA	NA	NA	NA	NA
doripenem	0.97	0.97	0.97	0.97	1.00	1.00	1.00	1.00	NA	NA	NA	NA	NA	NA	NA	NA	0.96	0.96	0.94	0.95	1.00	1.00	1.00	1.00	0.90	0.90	0.88	0.89	0.91	0.93	0.90	0.91
sulfisoxazole	0.99	0.99	0.98	0.98	0.99	0.99	0.98	0.98	NA	NA	NA	NA	NA	NA	NA	NA	NA	NA	NA	NA	NA	NA	NA	NA	NA	NA	NA	NA	NA	NA	NA	NA
ertapenem	0.98	0.97	0.96	0.97	0.99	1.00	0.88	0.93	NA	NA	NA	NA	NA	NA	NA	NA	0.96	0.96	0.97	0.96	NA	NA	NA	NA	NA	NA	NA	NA	0.84	0.83	0.81	0.82
moxifloxacin	1.00	1.00	1.00	1.00	NA	NA	NA	NA	NA	NA	NA	NA	1.00	1.00	1.00	1.00	NA	NA	NA	NA	NA	NA	NA	NA	NA	NA	NA	NA	NA	NA	NA	NA
cefuroxime	Removed	Removed	Removed	Removed	NA	NA	NA	NA	NA	NA	NA	NA	NA	NA	NA	NA	Removed	Removed	Removed	Removed	NA	NA	NA	NA	NA	NA	NA	NA	NA	NA	NA	NA
cefotaxime	0.98	0.97	0.97	0.97	0.97	0.97	0.97	0.97	NA	NA	NA	NA	NA	NA	NA	NA	Removed	Removed	Removed	Removed	NA	NA	NA	NA	NA	NA	NA	NA	NA	NA	NA	NA
gentamicin	0.98	0.97	0.98	0.98	0.99	0.98	0.98	0.98	NA	NA	NA	NA	0.99	1.00	0.94	0.97	0.94	0.94	0.94	0.94	0.98	0.99	0.95	0.97	0.93	0.91	0.91	0.91	0.95	0.97	0.89	0.92
cefpodoxime	1.00	1.00	1.00	1.00	1.00	1.00	1.00	1.00	NA	NA	NA	NA	NA	NA	NA	NA	NA	NA	NA	NA	NA	NA	NA	NA	NA	NA	NA	NA	NA	NA	NA	NA
piperacillin_tazobactam	0.94	0.94	0.94	0.94	0.97	0.90	0.85	0.87	NA	NA	NA	NA	NA	NA	NA	NA	0.91	0.90	0.87	0.88	0.94	0.96	0.84	0.89	0.91	0.91	0.92	0.91	Removed	Removed	Removed	Removed
erythromycin	0.97	0.98	0.97	0.97	NA	NA	NA	NA	NA	NA	NA	NA	0.97	0.98	0.97	0.97	NA	NA	NA	NA	NA	NA	NA	NA	NA	NA	NA	NA	NA	NA	NA	NA
trimethoprim_sulfamethoxazole	0.97	0.96	0.96	0.96	0.98	0.97	0.95	0.96	NA	NA	NA	NA	NA	NA	NA	NA	0.94	0.94	0.94	0.94	0.95	0.95	0.84	0.88	NA	NA	NA	NA	0.98	0.98	0.98	0.98
tetracycline	0.97	0.97	0.97	0.97	0.99	0.99	0.99	0.99	NA	NA	NA	NA	0.98	0.92	0.95	0.93	0.90	0.90	0.90	0.90	0.97	0.96	0.98	0.97	NA	NA	NA	NA	0.96	0.95	0.95	0.95
cefotetan	0.96	0.90	0.98	0.93	NA	NA	NA	NA	NA	NA	NA	NA	NA	NA	NA	NA	0.96	0.90	0.98	0.93	NA	NA	NA	NA	NA	NA	NA	NA	NA	NA	NA	NA
imipenem	0.96	0.96	0.96	0.96	1.00	1.00	1.00	1.00	NA	NA	NA	NA	NA	NA	NA	NA	0.93	0.93	0.93	0.93	0.98	0.98	0.98	0.98	Removed	Removed	Removed	Removed	0.87	0.89	0.88	0.87
cefepime	0.92	0.91	0.92	0.92	0.95	0.91	0.91	0.91	NA	NA	NA	NA	NA	NA	NA	NA	Removed	Removed	Removed	Removed	0.95	0.93	0.94	0.94	0.91	0.92	0.91	0.91	0.93	0.93	0.93	0.93
aztreonam	0.95	0.95	0.95	0.95	0.96	0.94	0.91	0.92	NA	NA	NA	NA	NA	NA	NA	NA	Removed	Removed	Removed	Removed	NA	NA	NA	NA	0.92	0.92	0.92	0.92	NA	NA	NA	NA
azithromycin	1.00	0.87	0.80	0.83	1.00	0.87	0.80	0.83	NA	NA	NA	NA	NA	NA	NA	NA	NA	NA	NA	NA	NA	NA	NA	NA	NA	NA	NA	NA	NA	NA	NA	NA
ceftazidime	0.94	0.94	0.94	0.94	0.95	0.92	0.92	0.92	NA	NA	NA	NA	NA	NA	NA	NA	0.95	0.91	0.92	0.91	0.96	0.94	0.93	0.93	0.81	0.82	0.81	0.81	Removed	Removed	Removed	Removed
nalidixic_acid	0.99	0.97	0.96	0.96	1.00	1.00	0.99	0.99	NA	NA	NA	NA	NA	NA	NA	NA	0.81	0.81	0.80	0.81	NA	NA	NA	NA	NA	NA	NA	NA	NA	NA	NA	NA
